# Comprehensive assessment of Indian variations in the druggable kinome landscape highlights distinct insights at the sequence, structure and pharmacogenomic stratum.

Gayatri Panda<sup>1‡</sup>, Neha Mishra<sup>1‡</sup>, Disha Sharma<sup>2,3</sup>, Rahul C. Bhoyar<sup>3</sup>, Abhinav Jain<sup>2,3</sup>, Mohamed Imran<sup>2,3</sup>, Vigneshwar Senthilvel<sup>2,3</sup>, Mohit Kumar Divakar<sup>2,3</sup>, Anushree Mishra<sup>3</sup>, Parth Garg<sup>1</sup>, Priyanka Banerjee<sup>4</sup>, Sridhar Sivasubbu<sup>2,3</sup>, Vinod Scaria<sup>2,3</sup>, Arjun Ray<sup>1\*</sup>

**1** Department of Computational Biology, Indraprastha Institute of Information Technology, Okhla, India.

**2** Academy of Scientific and Innovative Research (AcSIR), Ghaziabad, India.

**3** CSIR-Institute of Genomics and Integrative Biology, Mathura Road, Delhi-110020, India.

**4** Institute for Physiology, Charité-University Medicine Berlin, 10115 Berlin, Germany.

‡These authors contributed equally to this work.

\* arjun@iiitd.ac.in

## Keywords

Indian genetic variations, IndiGenome Consortium, Pharmacogenomics, single nucleotide variants, docking, adverse drug reactions

## 1 Abstract

2 The population diversity in India contains a treasure of clinically relevant rare mutations  
3 which may have evolved differently in different subpopulations. While there are many sub-  
4 groups present in the nation, the publicly available database like the 1000 Genome data (1KG)  
5 contains limited samples for Indian ethnicity. Such databases are critical for the pharmaceutical  
6 and drug development industry where the diversity plays a crucial role in identifying genetic  
7 disposition towards adverse drug reactions. A qualitative and comparative sequence and  
8 structural study utilizing variant information present in the recently published, largest curated  
9 Indian genome database (Indigen) and the 1000 Genome data was performed for variants  
10 belonging to the kinase coding genes, the second most targeted group of drug targets. The  
11 sequence level analysis identified similarities and differences among different populations based  
12 on the SNVs and amino acid exchange frequencies whereas comparative structural analysis of  
13 IndiGen variants was performed with pathogenic variants reported in UniProtKB Humsavar  
14 data. The influence of these variations on structural features of the protein, such as structural  
15 stability, solvent accessibility, hydrophobicity, and the hydrogen-bond network were investigated.  
16 In-silico screening of the known drugs to these Indian variation-containing proteins reveal  
17 critical differences imparted in the strength of binding due to the variations present in the  
18 Indian population. In conclusion, this study constitutes a comprehensive investigation into the  
19 understanding of common variations present in the second largest population in the world, and  
20 investigating its implications in the sequence, structural and pharmacogenomic landscape.

## 21 Introduction

22 The presence of single nucleotide polymorphisms imparts a genetic basis of human complex  
23 diseases and human phenotypic variations [A.J. Marian, 2013]. As per various reports, SNPs  
24 are found to be responsible for defining the risk of an individual's susceptibility to various  
25 drug responses and illnesses [Alwi, 2005]. The distribution of allele frequency of SNPs provides  
26 relevant information about the evolution, migration, and genetic structure of a population  
27 [Sanghera et al., 2008]. Most of the genetic variant-related data come from databases like the

28 1000 Genome database, GnomAD, Exac Database, containing ethnicity-wise variant information  
29 which is largely Eurocentric. It is so because majority of the studies that are performed to  
30 associate genetic variants with diseases, like the Genome-Wide Association Studies (GWAS) have  
31 been conducted mainly on the European population (78%) followed by Asian(10%), African(2%),  
32 Hispanic(1%), and other ethnicities (<1%) [Sirugo et al., 2019] neglecting the Indian population.  
33 It creates an information bias leading to a population-specific disease assessment analysis leaving  
34 the African and Indian populations under-studied and under-consulted. These population-  
35 specific SNPs deviate in variation patterns from other over-represented populations causing  
36 health and diagnosis disparities[Chan et al., 2015] [Wei et al., 2012].

37 Adverse drug reactions (ADRs) are a major contributor to morbidity and mortality. The  
38 presence of a genomic variation in genes coding for drug transport and metabolism have been  
39 associated with inter-individual differences in drug response and ADR risks. Several SNP-related  
40 studies have shown that variants can modulate the efficacy of a drug leading to adverse drug  
41 reactions (ADRs) [Impicciatore et al., 2001] [Sanghera et al., 2008]. Drug Gene Interaction  
42 Database (DGIdb) organizes the drug-gene interactions from various papers, databases and  
43 web resources[Freshour et al., 2021]. dbSNP, a curated database alone contains 38 million SNPs  
44 which makes timely maintenance, integration, and correction a cumbersome process [Sherry  
45 et al., 2001]. SNPs are a vital and decisive factor for finalizing a therapeutic approach and  
46 selection of drug and their dosages [Alwi, 2005]. European population being primary conduct of  
47 drug trials prior to approval and marketing of drugs could be one of the factors on the occurrence  
48 of ADRs[Clinical and Guidelines, 2006]. Hence, this prioritizes the need for population-specific  
49 pharmacogenomic analysis and integration of gene, drug, pathway, and potential drug-target  
50 related information.

51 Genetic studies of populations from the Indian subcontinent are important due to India's  
52 large share of the global population, complex demographic background, and unique social  
53 structure. Indo-genomic variation is fascinating due to the diverse ancestral components, social  
54 categorization of people, endogamy practised in different cultures, and dynamic and ancient  
55 admixture events that the Indian population has experienced over a long period of time.[Bamshad  
56 et al., 2001]. Reports suggest that the population expansion in India (post-agriculture) has led

57 to the emergence of a huge amount of genomic diversity exceeding the genetic diversity of the  
58 whole of Europe[Sengupta et al., 2016]

59 The practice of endogamy in various communities disturbs the frequency of a disease in  
60 different sub-groups of the Indian population [Nakatsuka et al., 2017], indicating that genetic  
61 divergence can also affect the efficacy of the drug. Globally, India is the largest generic drug  
62 provider [Bhosle et al., 2016](16). Regardless of the Indian genetic diversity, the current  
63 healthcare system in India follows the same drug therapy as in Europe and America. The use  
64 of genetic information, experiments, and other types of molecular screening helps a practitioner  
65 to choose an appropriate therapy for the first time, avoiding the time-consuming and expensive  
66 trial-and-error medication cycle. Extensive research on the population diversities and related  
67 SNPs causing the different inter-individual drug responses is the need of the hour for efficient  
68 treatment design. IndiGen programme was initiated with an aim to collect sequencing data  
69 of thousands of individuals from diverse ethnic groups in India and develop public health  
70 technologies applications using this population genome data[Jain et al., 2021].

71 In our present work, we conducted the first exhaustive and comparative study of common  
72 Indian-specific variants (using IndiGen data) with other populations to identify the population-  
73 specific variations causing a difference in drug responses and ADRs. This pharmacogenomic  
74 study was executed by keeping a focus on druggable genes of kinase's family, the second most  
75 targeted group of drug targets after the G-protein coupled receptors [Bhullar et al., 2018].  
76 The human genome encodes 538 protein kinases[Berndt et al., 2017]. Many of these kinases  
77 are associated with deadly diseases like cancer [Paul and Mukhopadhyay, 2012]. Most of the  
78 kinase targeting drugs have been tested and approved based on the trials done on European  
79 populations and it is possible that the same drugs might exhibit a deviation in efficacy and  
80 response on Indian population. The presence of a SNP in functionally important genes have  
81 higher chances of deleterious impact by either affecting drug-gene interaction or by causing  
82 structural changes at the protein level leading to disruption of the drug-binding sites [Lee, 2010].

83 As a result, interpreting the number of mutations and their effect on the structure, stability, and  
84 function of the protein is crucial. Any destabilising non-synonymous SNP (nsSNP) will cause  
85 the drug's metabolic process to be disrupted. This study was carried out at both sequence and  
86 structure level to examine the effect of missense mutations in Drug-Gene interaction as well as  
87 the structural changes caused by these mutations at the protein level. The sequence-level analysis  
88 was implemented to perceive the similarities and differences among different populations based  
89 on the single nucleotide variants (SNVs) and amino acid exchange frequencies. The effect of these  
90 variants on structural properties of the protein, like structural stability, solvent-accessibility,  
91 hydrophobicity, and the hydrogen-bond network were measured by utilizing different structural  
92 analysis tools. Any modification in protein-ligand binding due to the presence of SNVs was  
93 analyzed by molecular docking method. A comparative structural analysis was conducted  
94 using UniProtKB Humsavar data. This work will help us understand the variability caused by  
95 these variants and thus could guide us in deciphering the effect of SNP in the efficacy of the  
96 drug-protein/gene interaction.

## 97 **Results**

### 98 **Indian variations in the kinome landscape**

99 To first get an overview of the Indian variations present in the druggable kinome landscape, an  
100 exhaustive annotation of variation containing 545 kinase coding genes found in the IndiGen data  
101 and the families along with the number of drugs associated with them were mapped (Figure  
102 1). It was observed that despite having more drug-gene interactions, very few genes from the  
103 atypical protein kinases family contained missense mutations. The SNVs in a conserved protein  
104 region can influence the protein structure and its stability and can affect the protein-protein  
105 or protein-drug binding affinity. A gene with more variation and multiple marketed drugs has  
106 a greater tendency of causing ADRs. It was found that the tyrosine kinase family, which has  
107 a maximum (1978) number of FDA-approved drugs consists of the maximum (5013) number  
108 of variations. The class of kinases other than TK (Tyrosine Kinase) like the CMGC (cyclin-  
109 dependent kinase (CDK), mitogen-activated protein kinase (MAPK), glycogen synthase kinase

110 (GSK3), CDC-like kinase (CLK), TLK (Serine/threonine-protein kinase tousel-like 1) and AGC  
111 (PKA, PKC, PKG) contain a large number of variations i.e., 10518, 1193, and 2943 respectively  
112 but the number of drugs with known Drug-Gene interactions were limited to 213, 185, and  
113 339, which was comparatively less than the Tyrosine Kinase family. The CK1(casein kinase 1)  
114 class among all others contains the lowest (275) number of variations and lowest (18) drug-gene  
115 interactions. Kinase families associated with 545 kinase coding genes with number of drugs and  
116 SNPs observed in each class are shown in Supplementary Table S10.

### 117 **Analysis of the sequence-level differences of Indian variations in context with** 118 **other populations**

119 The genetic variation pattern in the Indian population was elucidated by generating an amino  
120 acid exchange matrix for all SNPs reported for 545 druggable kinase genes in IndiGen data.  
121 Figure 2A represents an amino-acid exchange matrix for the Indian population where the X and  
122 Y axis correspond to amino acids at the reference and alternative alleles in IndiGen data. Results  
123 from the analysis revealed that nearly 68% of Arginine(R) converts to Tryptophan (W) i.e., a  
124 hydrophobic amino acid converting to a basic polar amino acid. Similarly, 58% of Cystine (C)  
125 observed at reference SNP sites gets converted into Tyrosine (Y) i.e, a polar uncharged amino  
126 acid converting to polar aromatic amino acid. Other amino acid conversions with moderate  
127 frequency (40-50%) were Leucine(L) to Phenylalanine(F) both non-polar amino-acids, Lysine(K)  
128 to Glutamic acid(E) which involved basic to acidic conversion, and Asparagine(N) to Aspartic  
129 acid(D), an amidic to acidic conversion. It was worth noticing that regardless of having a  
130 maximum number of codons (6) coding for Serine(S) and Leucine(L), the amino acid exchange  
131 for these two residues were comparatively lower than Tyrosine (Y) and Tryptophan (W) which  
132 have only one associated codon.

133 In order to comprehend the inter-conversion distribution of the chemical groups present  
134 in mutating amino acids and develop a coherent relation of these amino-acid exchanges with  
135 physicochemical property, a chemical shift analysis was performed. The mutating amino acids  
136 were classified on the basis of their R-groups into 12 chemical classes (Aliphatic, Hydroxyl,  
137 Cyclic, Aromatic, Basic, Acidic, Sulpho, Amides, Non-polar, Uncharged polar, Hydrophobic

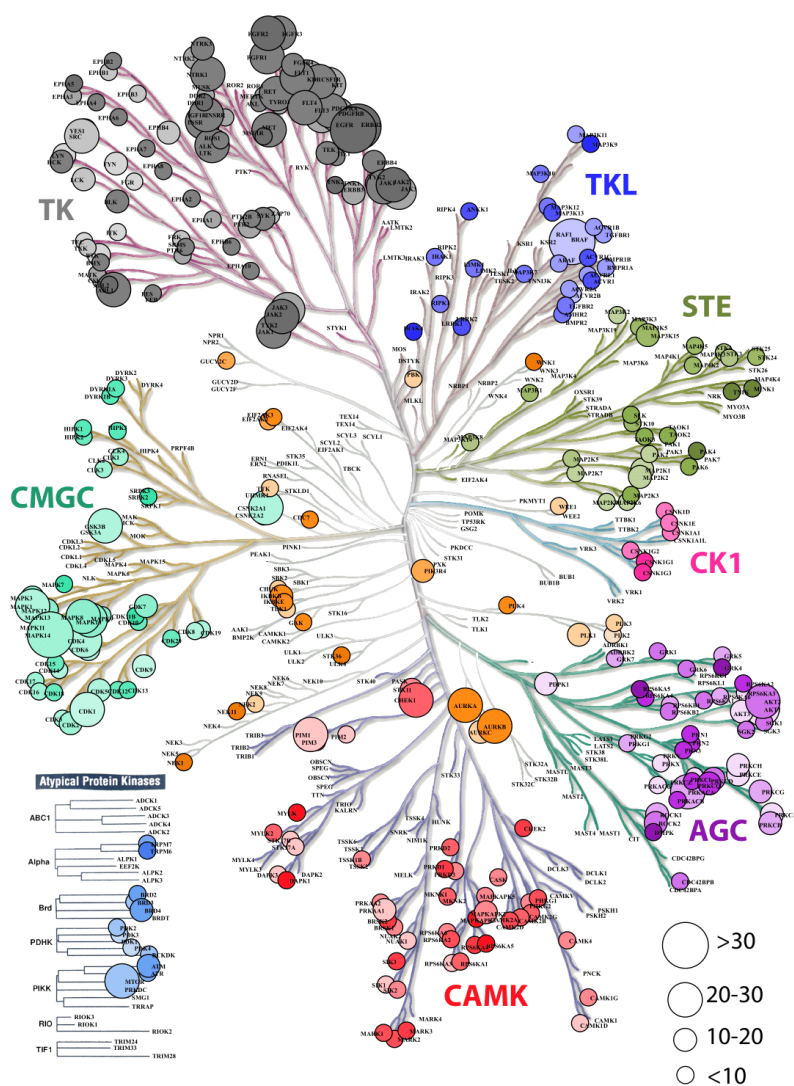

**Fig 1.** Dendrogram representation kinase coding genes in IndiGen data using KinMapbeta. The circle size represents the number of drug molecules available for a gene with known drug-gene interaction. The class of kinase is highlighted with a unique colour and the colour gradient in each data circle represents the number of variations present in IndiGen data for that gene.

138 , and Hydrophillic). In Figure 2B, X axis represents 12 chemical classes while on the Y-axis  
 139 the distribution of the delta amino acid count of reference and altered amino acids for each  
 140 chemical class (shown by 12 colors)has been shown. It can be observed that most of the residues  
 141 from the hydrophobic class (Gly, Ala, Val, Pro, Leu, Ile, Met, Trp, Cys, and Phe) have mutated  
 142 to either nonpolar (Gly, Ala, Val, Pro, Leu, Ile, Met, Trp, Phe), other hydrophobic (Gly, Ala,  
 143 Val, Pro, Leu, Ile, Met, Trp, Phe, Cys) or aliphatic (Gly, Ala, Val, Leu, Ile) amino acid classes.

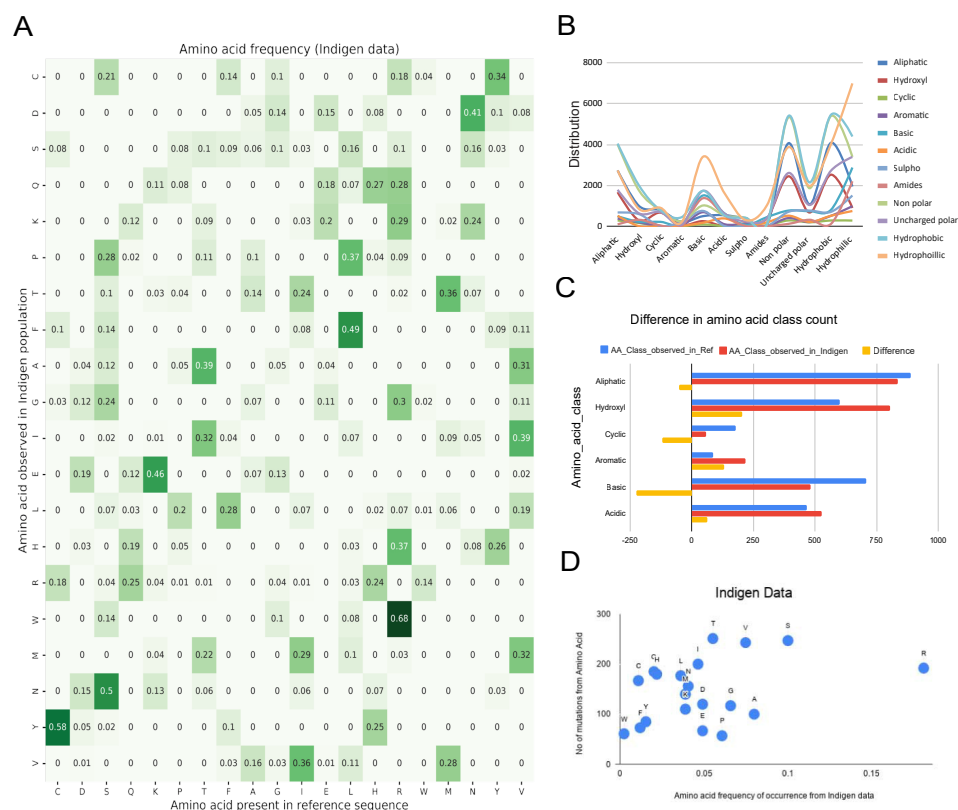

**Fig 2.** Sequence Analysis using SNPs reported for 545 druggable kinase Coding genes in IndiGen Data: A. Amino-acid exchange matrix for reference and altered amino acids of SNPs in Indigen data. B. Chemical shift observed among the reference and altered amino acids at SNP sites reported in Indigen data. C. Chemical changes observed among the reference amino acid in RefSeq(hg38) and altered amino acids at SNP sites reported in Indigen data. D. Scatter plot of mutability scores for each amino acid type in Indigen data

144 Inter-class or intra-class amino acid exchanges were also explored by looking at the classes  
 145 associated with the peaks of each of the distributions. Intra-class conversions were observed for  
 146 amino-acids belonging to hydrophilic, hydrophobic, and non-polar classes (peaks for the same  
 147 class) supporting conservative replacement[French and Robson, 1983]. Additionally, several  
 148 mutating amino acids have shown inter-class conversions such as aliphatic and hydroxyl amino  
 149 acids converted to hydrophobic or non-polar amino acids as well as amino-acids in basic and  
 150 acidic classes have converted to amino-acid from hydrophilic class. It was observed that many  
 151 amino-acids have shown tendency for conversion to an amino-acid belonging to non-polar or



152 hydrophobic amino acids(6/12 classes). The distribution for hydrophilic class was slightly  
153 different from others with a very prominent peak at basic class, indicating that these amino  
154 acids are more likely to exchange with the basic amino acids like Lys, Arg and His, apart from  
155 intra-class conversions.

156 In support of this, one more analysis was performed in which the reference amino-acids  
157 were taken as per RefSeq hg38 sequence whereas altered amino-acid at the same SNP site was  
158 taken from Indigen data. These amino-acids were classified into six different chemical classes  
159 (Aliphatic (Gly, Ala, Val, Leu, Ile), Hydroxyl (Ser, Thr), Cyclic (Pro), Aromatic (Phe, Tyr,  
160 Trp), Basic (Lys, Arg, His) and Acidic (Asp, Glu)) to avoid any repetition of amino acids. The  
161 difference in amino-acid counts at the SNP site for each class was then plotted. In Figure 2C,  
162 Y-axis represents six chemical classes of amino acids with respect to the amino acid counts in  
163 RefSeq(hg38) and IndiGen data. This chemical shift analysis confirms that there is a net loss  
164 in basic, cyclic and aliphatic amino acid class whereas a net gain is observed in the hydroxyl,  
165 aromatic and acidic amino acid classes. It is important to note here that while the hydroxyl,  
166 Aromatic and Acidic amino acid class contains 2,3, and 2 amino acids respectively, it still  
167 contributes to the net gain; while the aliphatic class, with maximum number of amino acid,  
168 showed a net loss in amino acid count. This clarifies that the net gain or loss in any amino acid  
169 class is independent of its size.

170 In order to understand the relationship between the mutational frequency of a specific  
171 amino acid with its frequency of occurrence in the IndiGen data, a mutability score for each  
172 amino acid type was calculated. In Figure 2D, mutability scores for amino acids observed  
173 in IndiGen data are shown. The plot shows that Arginine (R) is the most observed amino  
174 acid with  $>0.15$  frequency of occurrence whereas Tryptophan(W) is the least observed residue  
175 at the reference SNP site in IndiGen data. Amino acids like Valine, Serine, and Threonine  
176 have shown a greater propensity to get mutated as compared to other amino acids. These  
177 observations are also in agreement with the inferences made from the amino acid exchange  
178 matrix(Figure 2A). In Figure 2A, Arginine(R) can be seen as the most mutable amino acid  
179 with the greatest amino-acid exchange frequency( maximum frequency - 0.68) and Tryptophan  
180 as the least mutable amino-acid (maximum frequency-0.14).

181 After establishing an in-depth description of the Indian population, a comparative sequence  
182 analysis was performed for the variants in IndiGen data with other populations, such as  
183 European (EUR), American (AMR), African (AFR), South Asian (SAS), and East Asian (EAS)  
184 populations from the 1000 genome data. In Figure 3A, we observe that the mutation from  
185 Cystine(C) to Tyrosine(Y), and Arginine(R) to Tryptophan(W) was quite prevalent in all the  
186 populations except in American(AMR). A similar pattern of amino acid exchange and mutability  
187 is observed among different population although the frequencies varied.

188 Reports have suggested about the relationship between allele frequency and ethnicity of  
189 SNPs[Mattei et al., 2009, Mori et al., 2005]. Allele frequency(AF) plot (Figure 3B) was generated  
190 by calculating the minor allele frequency of variants in each ethnic group so as to explore how  
191 these variants differed among different populations(Indian and 1000 genome populations). The  
192 analysis revealed that allele frequency curve followed by SNPs in IndiGen and South-Asian  
193 were quite similar and comparatively different from others with very high AF for some variants  
194 belonging to GRK4 gene,i.e, Y292A and V486A. This indicates there is a considerable difference  
195 in allele frequency between Eurocentric and the understudied (AFR, Indian) populations. A  
196 similar AF plot (Figure 3C) was generated by comparing allele frequencies for SNPs in IndiGen  
197 data with their allele frequencies in different publicly available databases.

198 In order to identify all the common and rare population-specific SNPs among variants of  
199 different population, analysis was carried out using SNPs reported for twelve genes present in  
200 our structure data (without any allele frequency filter). In Figure 3D, a Venn diagram showing  
201 unique and common SNPs for twelve genes among different populations (Indian, SAS, EUR,  
202 AFR, EAS and AMR) is shown. It was observed that the IndiGen variants have very less  
203 overlap with the variants of other population(majorly European and South Asian) in 1000  
204 genome data indicating specificity of IndiGenic variants. These non-overlapping variants draw a  
205 distinction between Indian and 1000 genome population. The South-Asian population contains  
206 samples for Gujrati Indian from Houston (GIH), Punjabi from Lahor, Pakistan (PJL), Bengali  
207 from Bangladesh (BEB), Sri Lankan Tamil from the UK (STU) and Indian Telugu from the  
208 UK (ITU). Despite containing variants from Indian ethnicity, South-Asian SNPs have shown  
209 less overlap with IndiGenic variants supporting the hypothesis that specific subgroups have

210 conserved mutation that has spread through that population and evolved differently through  
211 time [Christensen et al., 2003]. This observation stresses on the fact that behavioural and  
212 environmental changes(epigenetics) might lead to genetic differences among populations.

213 Upon having an in-depth understanding of the effects of variations on the sequence, we next  
214 explored the effect on the protein's structure. Firstly, protein domain analysis was done to find  
215 out the number of SNPs falling within the domains and the number of SNPs that are falling  
216 before and after the domains(Figure 3E). In order to understand the impact of SNVs at protein  
217 structure, the protein sequences were divided into three parts – domain regions, post-domain  
218 region and pre-domain region, indicating the position of a variant based on its presence before,  
219 within or after protein domain. It was observed that for Indigen data 952 variants were falling  
220 within the domain while 226 variants for were present in post domain region whereas only twelve  
221 variants were observed in the pre-domain region. Similarly for variants in 1000 genome data for  
222 European, American, African, East Asian and South Asian populations were categorised into  
223 pre-domain, post domain and within domain variants. Surprisingly all the populations from  
224 1000 genome and Indigen data revealed a larger bias for a SNV to fall in within the protein  
225 domain or post-domain region as compare to pre-dromain region.

## 226 **Structure level comparison of IndiGen and Disease-causing variants**

227 To further understanding the SNV's effect on the protein structures, IndiGen structure dataset  
228 was constructed by taking into account only variants of druggable kinases lying within the  
229 crystal length, thus giving only twelve kinase genes and corresponding 22 variants. Disease  
230 causing variants corresponding to these 12 genes were extracted from Humsavar data (217  
231 variants) and compared. The structural characteristics like distribution of solvent -accessibility,  
232 secondary structure, conservation score and change in hydrophobicity of variants/variant  
233 residues in IndiGen structure data and Humsavar data were compiled and compared. For  
234 solvent accessibility comparison (in Figure 4A), a cutoff of 5% solvent exposure was applied  
235 onto the Naccess results for variants in both datasets to distinguish between buried and exposed  
236 residues. The results revealed most mutations are observed in the exposed residues in both the  
237 datasets. This is in line with the conventional study shown by a group that states more than

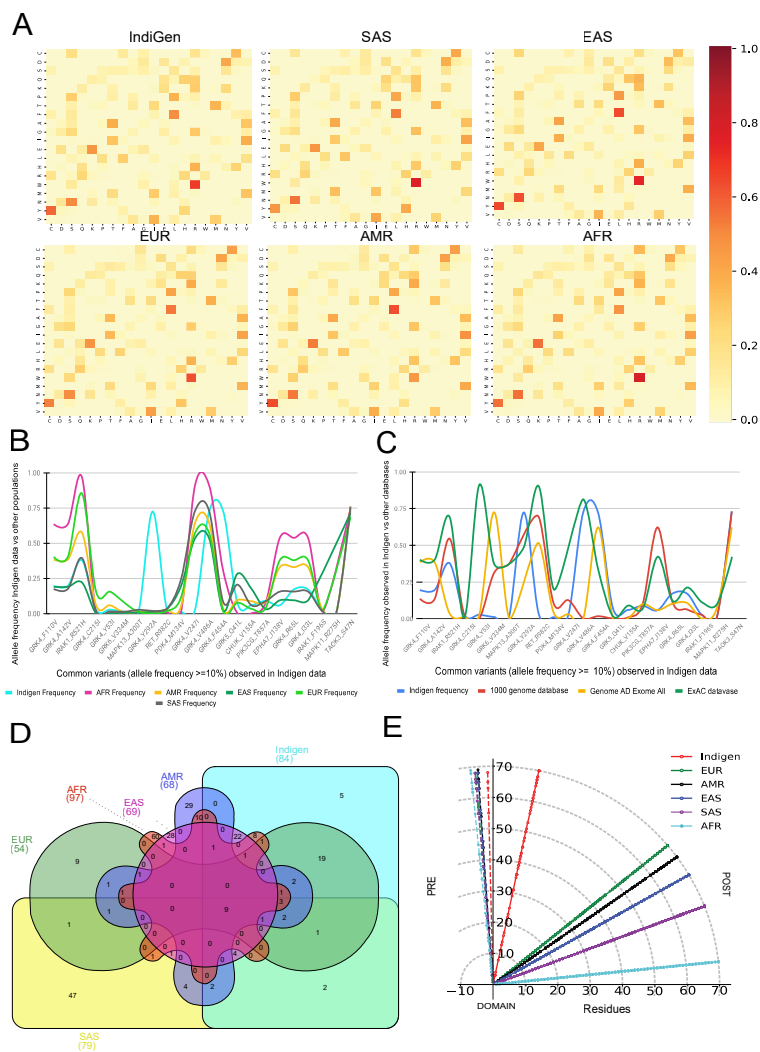

**Fig 3.** A. Comparing the trend of amino acid exchange among different populations from 1000 genome project and with Indian population. The heatmap was generated on the basis of the allele frequency of variants in IndiGen and other populations of 1000 genome data. The colour intensity of each cell is proportional to the frequency of amino acid exchange from one specific amino acid to another among all the databases. B. Comparing IndiGen specific variations (22 variants) with allele frequency  $\geq 10\%$  different populations with 1000 genome data. On the X-axis common IndiGen variants qualifying the filters used for structure data are shown with gene and variant names (22 variants) whereas on the Y-axis, allele frequency for these variants in IndiGen and other populations is plotted. C. IndiGen specific SNPs (22 variants) with  $AF \geq 10\%$  observed in different databases like 1000 genome project, Genome AD exome data and Exac database; with IndiGen variations on X-axis and their allele frequencies in different databases on Y-axis. D. Venn-diagram of common Indian variants (allele frequency (AF)  $\geq 10\%$ ) among different populations. E. Variations lying pre-, within and post domain was mapped where the angle of the lines are a function of the number of variations, with the y-axis "Domain" location as zero, and where larger variations in a population shall bear larger weight. Variations were plotted on the basis of their distance from post and pre-domain location.

238 60% of solvent exposed SNPs have a disease association[Gong and Blundell, 2010]. In IndiGen  
239 data, 81.8% of variant residues (22 residues) were found to be exposed which was roughly equal  
240 to solvent exposure of residues in Humsavar data with 81.1% exposed residues (74 residues). No  
241 appreciable difference was observed in solvent accessibility for variants in both datasets. The  
242 secondary structure preference of variants in both the datasets revealed that variant residues  
243 in IndiGen data have a slight preference to occur on alpha-helix part of the protein while the  
244 variants in Humsavar data share equal secondary structure preference for their occurrence either  
245 in alpha-helix or in loop/random coil of a protein (Figure 4B).

246 Residue conservation scores for variants in IndiGen structure data (22 residues) and in  
247 Humsavar data (74 residues) were calculated using ConSurf [Ashkenazy et al., 2016]. A density  
248 plot showing the distribution of conservation score for variants in both the datasets is shown in  
249 Figure 4C. The Humsavar density curve follows nearly normal distribution while the IndiGen  
250 curve follows a bimodal distribution with two peaks. Moreover, the median line divides the area  
251 under the curve into two equal halves. The median line for Humsavar data (0.007) was present  
252 closer to 0 than IndiGen data's median (0.358). Hence, in order to elucidate the percentage  
253 of residues with more or less conservation, a threshold value of -1/+1 relative conservation  
254 score was considered. It was observed that the percentage of highly conserved residues (with  
255 ConSurf conservation score greater than -1) was more in Humsavar distribution (steeper) than  
256 in IndiGen. Likewise, the percentage of highly variable residues (with conservation score >1)  
257 adhering to the area under the curve on the right of +1 was more for IndiGen data than for  
258 Humsavar data, indicating that Humsavar data has a higher percentage of residues that are  
259 involved in variations, being more conserved.

260 The distribution of change in hydrophobicity from reference to altered residue for variants  
261 in Humsavar and IndiGen structure data is shown in Figure44D. The medians for both the  
262 distributions were found next to each other and very close to 0, suggesting that the percentage  
263 of variations with increase or decrease in hydrophobicity is almost equal in both the datasets.  
264 In order to find out the percentage of residues with some significant change in hydrophobicity,  
265 a threshold value of -2 was considered for increase in hydrophobicity whereas +2 threshold was  
266 taken for decrease in hydrophobicity. It was observed that the percentage of varying residues

267 with significant increase in hydrophobicity was observed for IndiGen structure data whereas the  
268 percentage of residues with significant decrease in hydrophobicity was found for Humsavar data.

## 269 **Effect of SNVs on structural properties of the protein**

### 270 **Structural stability of generated variants**

271 Prior to investigation of the structural properties of nsSNPs in IndiGen Structural Data,  
272 the thermodynamic stability of minimized native and mutant structures was evaluated using  
273 FoldX. The influence of genetic variation on protein's stability and flexibility was predicted  
274 using Dynamut by calculating  $\Delta \Delta G$  (change in folding energy) value for all the 22 variants.  
275 Dynamut implements normal mode analysis for predicting the effect of SNP on native protein  
276 structure. The results from Dynamut revealed that 11/22 variants had  $\Delta \Delta G$  negative suggesting  
277 destabilization after mutation. The FoldX and Dynamut energy values were visualized in the  
278 alluvial plot and shown in Figure 4E. The plot shows 12 genes, their native protein structures  
279 (PDB IDs: 4YHJ, 5TQY, 3NYO, 6GQ7, 4TNB, 6BFN, 3GC9, 6BDN, 6I83, 4EYJ, 3NRU and  
280 3D2R) and 22 mutants linked with their corresponding energy values. The gene names and  
281 the PDB codes for native protein structures were shown in the first two columns followed by  
282  $\Delta G$  (in kcal/mol) for all natives given by FoldX and  $\Delta \Delta G$  (in kcal/mol) given by Dynamut  
283 for all the variants. The PDB names in the plot were arranged on the basis of the decreasing  
284 number of mutations reported for them. As per Dynamut predictions, a mutant F454A of  
285 PDB code 4YHJ has shown  $\Delta \Delta G$  of -2.767 kcal/mol (Destabilizing) and change in Vibrational  
286 Entropy Energy between Wild-Type and mutant ( $\Delta \Delta S$ -Vib) as 1.178 kcal.mol<sup>-1</sup>. K-1 showing  
287 an increase of the molecular flexibility after mutation.

### 288 **Secondary Structure Annotation and Relative Solvent Accessibility of mutated** 289 **residues**

290 The secondary structure of a protein includes largely  $\alpha$ -helix and  $\beta$ -pleated sheet structures,  
291 which is involved in local interactions between stretches of a polypeptide chain. The ability  
292 of a protein to interact with other molecules depends on amino acid residues located on the  
293 surface with high solvent accessibility. Any alterations in these residues may affect the protein's

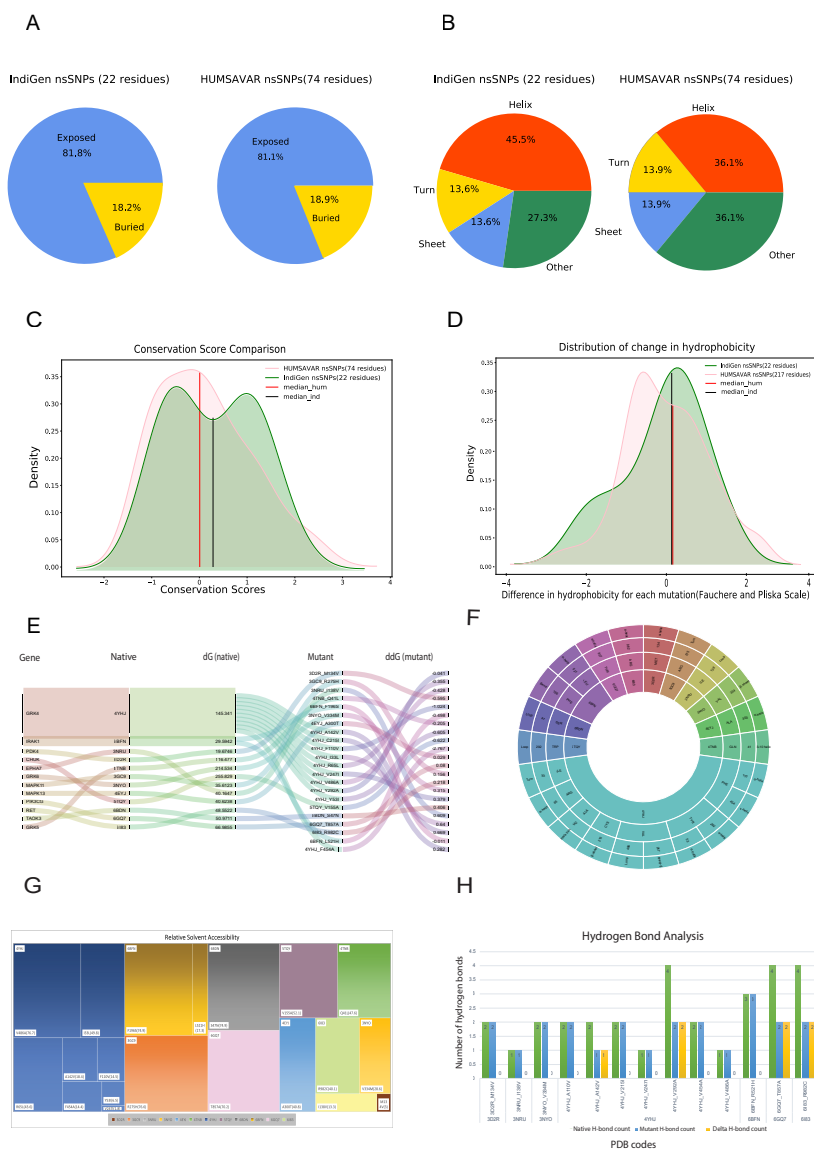

**Fig 4.** Comparison of structural characteristics of variants in IndiGen and Humsavar data: A. Solvent accessibility for the variants in both datasets. B. Secondary structure in which each of the variants occurs in both datasets. C. Conservation score and  $\Delta$ Hydrophobicity distribution of variants in Humsavar and IndiGen data. D. The area under the curve present on the left of -2 ( $\Delta$ Hydrophobicity) belongs to the percentage of residues for which a significant increase in hydrophobicity after mutation was observed while the exact opposite was observed for percentage of residue present on the right of +2 on x-axis. E. Alluvial plot representing FoldX Energy plot for 12 native PDBs ( $\delta G$  Native column) and change in folding energy for 22 variants ( $\delta \delta G$ ) by Dynamut (in kcal/mol). F. Sunburn Plot representing secondary structure assignment done by DSSP for mutant residues. G. Treemap showing relative solvent accessibility calculated by Naccess for mutated residues. H. HBPLUS results showing the number of hydrogen bonds made by mutated residue before mutation (green -bar), after mutation (blue-bar), and  $\Delta$ H-bonds (yellow bars)

294 functioning thereby increasing the importance behind the study of structural properties of  
295 mutated residues. Solvent accessibility (using Naccess) and the secondary structure properties  
296 (using DSSP) of mutated residues were studied. The Figure 4F is a sunburn plot showing  
297 results for secondary structure assignment by DSSP. The plot consists of four concentric circles  
298 with innermost circle comprising 12 PDB IDs, second-inner circle comprising 3-letter code of  
299 reference amino acid present at mutant site, third-inner circle shows the mutant position and  
300 outermost circle contains the secondary annotation for that residue given by DSSP. The color  
301 coding was done on the basis of native PDBs. Majority of the variants were found to be present  
302 in alpha-helix region as compared to other regions of the protein.

303 In the Figure 4G, the results obtained from Naccess for relative solvent accessibility of  
304 mutated residue was represented by a Treemap. The area of rectangles represents the relative  
305 solvent accessibility scale associated with mutated residue. All 12 PDB IDs are shown with 12  
306 different colors forming a hierarchy. The color-coding was done on the basis of associated PDB  
307 IDs. The relative solvent accessibility of two mutated residues belonging to PDB code 4YHJ  
308 (Y53I and C215I) was zero hence not shown in the figure. The area of rectangle for R275H and  
309 V486A mutants of 3GC9 and 4YHJ pDBs were largest with rel. solvent accessibility more than  
310 75 suggesting that these two reference amino acids, arginine of 3GC9 at 275th position and  
311 valine at 486th position were relatively more accessible than others. The results from this plot  
312 disclosed that there were 5 residues with more than 60 relative solvent accessibility (Arginine,  
313 Valine, Phenylalanine and Serine) belonging to 3GC9, 4YHJ, 6BDN and 6BFN PDB IDs.

#### 314 **Effect of SNP in hydrophobicity and hydrogen bonding**

315 A single amino acid change may result in alteration of hydrophobicity or disruption of the  
316 hydrogen-bond network thus modifying the structure and function of the protein as well [Kumar  
317 and Biswas, 2019]. The change in hydrophobicity observed in mutants in IndiGen structure  
318 data were arranged according to Fauchere and Pliska scale [FAUCHÈRE et al., 1988] (Supple-  
319 mental\_Fig.S1-A). In the IndiGen structure data, 12 out of the 22 variants exhibited decrease  
320 in hydrophobicity whereas an increase in net hydrophobicity was observed in the rest. The  
321 number of hydrogen bonds made by the altered residue before and after the mutation were



322 calculated using the HBPLUS program (Figure 4H). Variants 4YHJ\_A142V showed a loss of  
323 1 hydrogen bond, while 4YHJ\_V292A, 6GQ7\_T857A and 6I83\_R982C resulted in loss of two  
324 hydrogen bonds.

### 325 **Effect of SNP on Ligand Binding**

326 Given the pharmacological importance of kinase proteins, molecular docking was performed to  
327 comprehend the effect of SNP in the drug-gene interaction. All FDA approved drugs available  
328 in DGIdb for genes present in IndiGen structure data were docked against the native and  
329 mutant protein structures. In 25 out of 62 protein-drug pairs, changes in binding affinity (0.7  
330 to -9.1 kcal/mol) was observed in native and mutant forms, whereas for remaining pairs, no  
331 change in binding affinity was observed. The Figure 5A represents the change in binding affinity  
332 observed for the 25 protein-drug pairs. In 20 protein-drug pairs a decrease in binding energy was  
333 observed while 5 pairs have shown an increase in binding-energy; indicative that the presence  
334 of an SNP destabilizes the complex. One protein-drug pair, T857A mutant of gene PIK3CG  
335 (PDB ID: 6GQ7), which when bound to drug Zinc sulfate (DrugBank id - DB09322) revealed a  
336 stark decrease in binding energy(-9.1 kcal/mol) when comparing the native- (-13.0 kcal/mol)  
337 versus mutant- (-3.9 kcal/mol) drug pair. These 25 protein-drug pairs with difference in binding  
338 affinity were further considered for binding site and ligand similarity.

339 It was observed that the binding pocket of the ligands in native and mutant forms for their  
340 respective receptors was the same, stipulating that presence of SNP didn't change the binding  
341 site of drugs with their target protein. A snapshot of the first pose of ligand docked in the  
342 protein was taken in PyMol for all native protein-drug complex. The mutated residue in every  
343 complex is shown in red-color with sticks representation which was away from the binding pocket  
344 of the ligands in all cases(except in the case of 6GQ7-T857A). Ligand binding pockets (post  
345 docking) shown in mesh representation with different colors in Supplemental\_Fig\_S2-(A-G).

346 In an attempt to find out the reason behind the huge decrease in binding affinity in case of  
347 mutant T857A(PDB ID: 6GQ7)-zinc-sulfate(DrugBank id- DB09322) complex the binding site  
348 residues of this drug in native and mutant complex were compared and visualized in PyMol  
349 [Schrödinger and DeLano] and LigPlot+ [RA and MB, 2011], shown in 5D. It was observed

350 that the location of the binding pocket-residues in mutant and native forms was unchanged  
351 and the main binding pocket was away from the mutated residue. However, a decrease in one  
352 hydrogen bond was observed in ligand interaction diagram of native and mutant complexes..

### 353 **Binding Site Similarity Analysis**

354 Fpocket was used to detect the binding pockets present in a protein structure [Le Guilloux  
355 et al., 2009]. For every protein in IndiGen structure data, the best binding pose of its ligand  
356 was considered as main pocket which aligned to detected pockets by Fpocket. Only the pocket  
357 which perfectly aligned were considered for the analysis (12 pockets). Pocket similarity score  
358 (distance between a particular pocket pair) for each protein-pocket pair was calculated using  
359 DeeplyTough tool shown in (Figure 5B). Similarity is proportional to the score, less negative  
360 means more similar. After applying a zscore cutoff (-/+0.70), all the pockets pairs were classified  
361 as similar, dissimilar or intermediate, resulting in 12 pairs of similar and dissimilar pockets. The  
362 difference in distribution of PS scores of similar and dissimilar pocket pairs is visible from the  
363 box plot in Figure 5C. Statistical test (Mann–Whitney U test) revealed statistically significant  
364 ( $p < 0.05$ ) difference between the similar and dissimilar pocket pairs.

### 365 **Ligand Similarity/diversity Analysis**

366 The 25-protein drug pairs with delta binding energy observed after docking were considered for  
367 this analysis. In total there were five different PDB structures (6GQ7, 5TQY, 3GC9, 4TNB,  
368 6I83) with five respective mutations and 24 drugs as shown in (Supplemental\_Table\_S7). All  
369 drug-like chemicals from our ligand dataset were considered for chemical similarity analysis.  
370 Two drugs- DB09332 (Zinc Sulphate) and DB00040 (Glucagon) were excluded in this analysis  
371 as zinc-sulfate contains counter-ion and glucagon is a peptide hormone. From this analysis,  
372 it was observed that all the associated drugs exhibit a great molecular diversity (Figure 6).  
373 The maximum pairwise similarity for Morgan2 fingerprints and MACCS fingerprints has a  
374 Tanimoto score of 0.40 and 0.70, respectively. On the other hand, the pairwise dissimilarity  
375 (1-similarity) for Morgan2 fingerprints and MACCS fingerprints has a Tanimoto score of 0.98  
376 and 0.90, respectively. The computational prediction platform ProTox-II, which includes

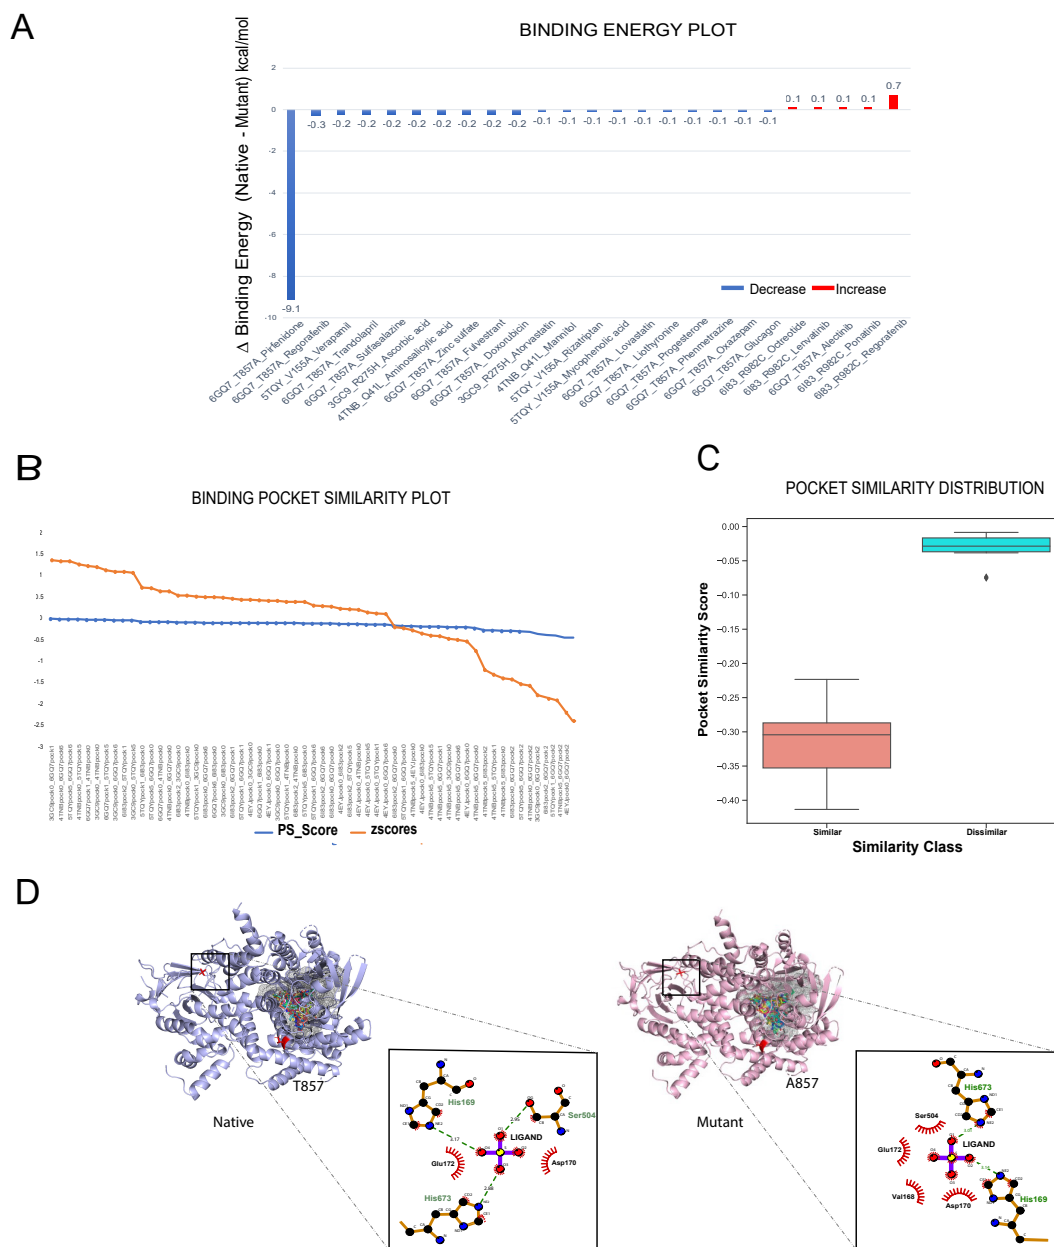

**Fig 5.** A. Bar plot showing docking results for 25 protein-drug pairs on x-axis and change in binding affinity observed on y-axis. Blue bars represent a decrease in binding affinity and red bars represent increase in binding affinity after mutation. B. Pocket Similarity Curve for proteins in IndiGen structure data. C. Box-plot showing distribution of PS Scores of similar and dissimilar pocket pairs. Using Mann–Whitney U test, p-value(0.000018) was calculated and used to interpret the result of the test. D. Ligand interaction diagram of native 6GQ7(PIK3CG gene) and its mutant T857A bound to Zinc Sulfate (DB09322) and main binding pocket (grey pocket) where majority of ligands docked.

377 cheminformatics-based machine learning models for predicting 46 toxicity endpoints, was used  
 378 to predict toxicity profiles of compounds/drugs. For the prediction of various toxicity endpoints,  
 379 such as acute toxicity (LD50 values), hepatotoxicity, cytotoxicity, carcinogenicity, mutagenicity,  
 380 immunotoxicity, adverse outcomes pathways (Tox21), and toxicity targets, ProTox-II integrates  
 381 many statistical methodologies such as molecular similarity, pharmacophores, and fragment  
 382 propensities, as well as machine learning models (off-targets). In vitro assays (e.g. Tox21 assays,  
 383 Ames bacterial mutation assays, hepG2 cytotoxicity assays, Immunotoxicity assays) and in vivo  
 384 cases were used to create the predictive models (e.g. carcinogenicity, hepatotoxicity). These  
 385 models have been validated on separate external datasets and have shown to be effective and  
 386 well-cited.[Banerjee et al., 2018].

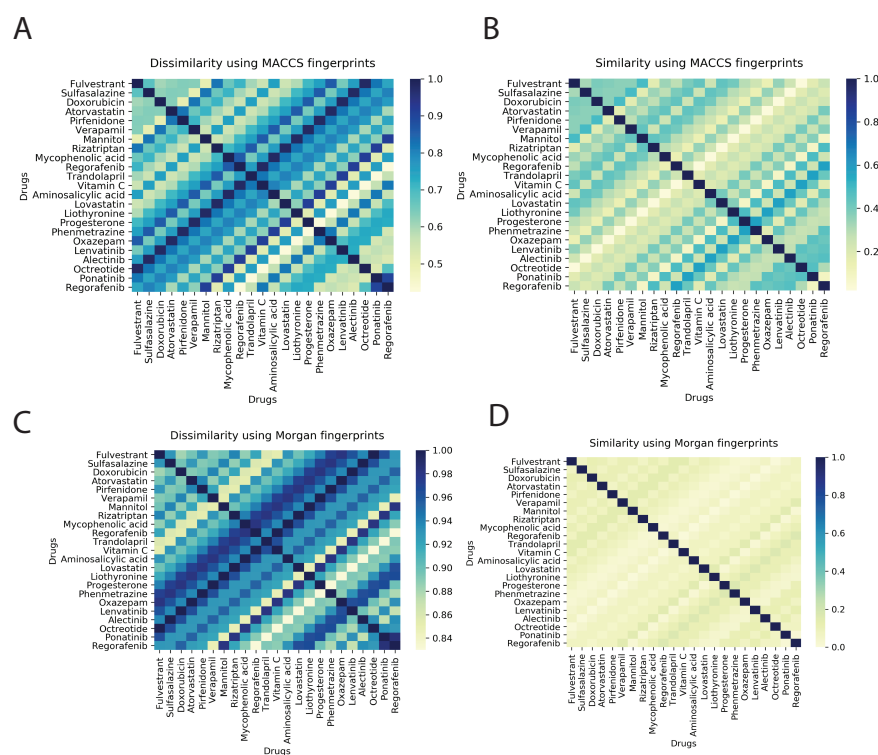

**Fig 6.** Heat maps representing drug pairwise similarity and dissimilarity. A. Ligand dissimilarity using MACCS fingerprints. B. Ligand similarity using MACCS fingerprints C. Ligand dissimilarity using Morgan fingerprints. D. Ligand similarity using Morgan fingerprints. Similarity and dissimilarity (1-similarity) score is represented using Tanimoto coefficient (taking a value between 0 and 1, with 1 corresponding to maximum similarity)

387 As per the predictions made by ProToxII (Supplemental\_Table\_S10), it is observed that  
 388 the mycophenolic acid (DB01024) which is an immunosuppressant drug, interacting with PDB

389 structure 6GQ7, mutations T857A, is hepatotoxic, immunotoxic and cytotoxic. It also inhibits  
390 SR-MMP(mitochondrial membrane potential) with a confidence score of 0.79. Another interest-  
391 ing observation is the drug Regorafenib (DB08896) which is also predicted to be hepatotoxic, and  
392 is active in two different stress response pathways SR-MMP, and SR-p53. Regorafenib is associ-  
393 ated with adverse events like hypertension, stomatitis, abnormal liver function.[Krishnamoorthy  
394 et al., 2015]. However, the exact mechanism of developing hypertension is not very well-defined.  
395 Abnormalities in liver function is also reported in case of Regorafenib[De Wit et al., 2014]. The  
396 drug progesterone (DB00396) is predicted to be active in six adverse outcome pathways(AOPs).  
397 Like progesterone, many other drugs can result in such molecular inhibition/ activation of  
398 NR-AR by progesterone, and can result in reduced AR signalling /impaired follicle recruitment  
399 as cellular or tissue level response and may be impaired fertility in organism[Pivonello et al.,  
400 2020]

#### 401 **Phenotypic drug-drug similarity**

402 In order to look for phenotypically similar drugs in IndiGen data a list of protein IDs and drug  
403 molecules associated with them was considered (Supplemental\_Table\_S7). This information  
404 could be useful to get insights about similar drugs present in IndiGen structure data. A  
405 correlogram was plotted with drug names on x/y axis. The positive and negative correlation was  
406 shown by blue and red color circles. The color intensity and circle size depends on correlation  
407 coefficient. (Supplemental\_Fig\_S1-B). A strong correlation (more blues dots in Figure S1-B) can  
408 be observed from this plot indicating promiscuous nature of drugs (binding to multiple targets)  
409 or target proteins. For instance drugs Fulvestrant and Rizatriptan are chemically dissimilar  
410 (similarity score 0.20 in Figure 6). However, in terms of phenotypic drug-drug similarity - they  
411 are highly similar as they bind to the same protein target highlighting the differential binding  
412 ability of kinases to a set of fairly specific inhibitors.

#### 413 **Protein-Protein Interaction Network and Biological Processes involved**

414 Since an evident decrease in binding energy was observed in case of T857A mutant of gene  
415 PIK3CG with drug Zinc sulfate (DrugBank id - DB09322), this difference in binding affinity can

416 affect the structure and functioning of this protein and others associated with it, thereby under-  
417 standing its significance and functions linked with is important. PIK3CG gene phosphorylates  
418 phosphatidylinositol 4,5-bisphosphate and generates phosphatidylinositol 3,4,5-trisphosphate  
419 (PIP3) which is responsible for the recruitment of PH domain-containing proteins to membrane,  
420 therefore activating signaling cascades involved in cell growth, survival, proliferation, motility  
421 and morphology[M. Christopher, 2016b]. PI3Ks play a pivotal role in human cancers leading to  
422 the discovery of small inhibitors of these lipid kinases.[Wang et al., 2015]. The physical and  
423 functional association of the protein PDB-6GQ7 were studied by giving the gene name (PIK3CG)  
424 as input to the STRING database.[Szkarczyk et al., 2019] The gene PIK3CG was found to  
425 have 10 predicted functional partners, i.e., HRAS, KRAS, NRAS, PIK3R6, PIK3R2 PIK3R5,  
426 PIK3R1, PIK3R3, AKT1 and PDPK1 shown in Supplemental\_Fig\_S3A. The information related  
427 to the biological processes in which these genes are involved was obtained from Gonet webserver  
428 [Pomaznoy et al., 2018], as shown in Supplemental\_Fig\_S3B.

## 429 Discussion

430 Adverse drug reactions are often associated with genes that are more prone to variations and  
431 targeted by multiple drugs. Firstly, to have a global understanding of the distribution of the  
432 common variations present in India, the kinome tree for all the druggable kinase genes was  
433 constructed (Figure 1). This revealed that tyrosine kinase class consisted large number of  
434 variations and was found to be associated with numerous drugs. Receptors tyrosine kinases  
435 (RTKs) are involved in broad range of functions such as proliferation, differentiation and  
436 apoptosis of cells and have been extensively used as drug target in cancer studies. Many of the  
437 tyrosine kinase inhibitors are antibody-based drugs used in treatment of tumors, malignancies  
438 and inflammatory diseases[Bennasroune et al., 2004]. The sequence based analysis(Figure 3B)  
439 of IndiGen variants disclosed that Indian population is genetically very different from the other  
440 populations. Conservative mutations can affect the protein's stability which can modulate  
441 its functioning and catalytic pattern followed by it in different organisms[Rodriguez-Larrea  
442 et al., 2010]. Studies have shown there is a strong correlation between frequency of occurrence

443 of amino acids in the human genome and number of associated codons[Alwi, 2005]. On the  
444 contrary, observation made in amino-acid exchange matrix and chemical shift analysis(Figure  
445 2) suggested that mutation from one amino-acid type to other was independent of number of  
446 codons coding for any amino-acid. The changes in chemical classes for majority of amino-acids  
447 were found to be conserved indicating more intra-class mutations than inter-class mutations.  
448 The mutability plot (Figure 2D) revealed that Arginine (R) is more mutable than other amino  
449 acids and the probable reason behind this could be the presence of CpG dinucleotide in the  
450 codons coding for Arginine which is relatively vulnerable to mutations[M. Christopher, 2016a].

451 Ancestry has a very important role to play in evolution of a SNP in different ethnic groups  
452 of a population. This also indicates that there is a relationship between allele frequency and  
453 ethnicity of the population. Even a fractional exchange of amino acids can have a completely  
454 different impact on different populations. Amino acid frequency comparison study stipulated  
455 that the variant frequency pattern followed a similar trend in all the populations except  
456 Indigen(Figure 3B). Some variants were found to be common in Indian population and rare  
457 in other populations(population-specific variants) indicating that it will be affecting Indian  
458 population with higher frequency than others(Figure 3D). On comparing allele frequency of  
459 Indian mutations with the ones present in publicly available databases it was inferred that many  
460 conserved mutations in IndiGen data are still understudied as none of the existing databases  
461 contains these mutations (referring to IndiGen data=samples from 1000 individuals of strict  
462 Indian ethnicity)(Figure 3C). Protein domain regions are stable conserved parts of a protein  
463 sequence and its 3D structure. Therefore, variants present inside the protein domains are more  
464 likely to affect the protein structure, stability and function. The comparative study of variants  
465 on the basis of their position with respect to domain location suggested that many Indian  
466 variants were present either within the domain or in the post-domain region.(Figure 3E)

467 One of the most useful predictors of the phenotypic effects of missense mutations is protein  
468 structural information and stability. Missense mutations can disrupt protein structure and  
469 function in one of two ways: they can destabilise the entire protein fold or they can change  
470 functional residues, such as active sites or protein-protein interactions, and pathogenic mutations  
471 are enriched in both the buried cores of proteins and in protein interfaces[Gerasimavicius et al.,

472 2020]. Reports have claimed that buried amino acids are often observed to be associated with  
473 diseases and commonly observed in functional sites. [M. Christopher, 2016a]. On the contrary  
474 in relative structural analysis of IndiGen and Humsavar dataset it was found that residues  
475 with relatively higher solvent accessible surface were more prone to mutations.(Figure 4A) [M.  
476 Christopher, 2016a]

477 Mutations that occur in properly structured part of a protein are more likely to be pathogenic  
478 than mutations that do not, due to their strong destabilizing effect on protein structure.  
479 According to stability analysis performed by Dynamut, 11 variants were found to destabilize  
480 protein's structure and from 11 destabilizing variants, 7 were found to be present in the helix  
481 region of the protein. IndiGen variants occur more in the alpha-helix region while Humsavar  
482 variants share equal secondary structure preference for their occurrence either in alpha-helix  
483 or in loop/random coil of a protein.(Figure 4B) Several studies have suggested that secondary  
484 structure elements like sheets and helices vary a lot in their ability to tolerate mutations. This  
485 differential tolerance of mutations could be due to difference in number of non-covalent residue  
486 interactions within these secondary structure units.[Abrusán and Marsh, 2016].The conservation  
487 score distribution implied a higher percentage of residues with greater conservation in that  
488 Humsavar data than in IndiGen data. Since Humsavar variants are reported to be associated  
489 with a disease it his highly likely that their presence in highly conserved region could be a  
490 reason behind their disease occurrence. Hydrophobic interactions and hydrogen bonds are the  
491 two most prevalent interactions present in protein structure. Hydrophobes as the name suggests  
492 tend to isolate themselves from water molecules due to which many hydrophobic amino acids  
493 are often found to be buried inside the protein structure. Contrasting results were observed in  
494 hydrophobicity distribution with significant increase in hydrophobicity for IndiGen structure  
495 data whereas the decrease in hydrophobicity was found for Humsavar data. (Figure 4C)

496 Occurence of SNPs at the ligand binding sites (LBSs) can influence protein's structure,  
497 stability and binding affinity with small molecules. Interesting findings claimed that ligand  
498 binding residues have a significantly higher mutation rate than other parts of the protein [Kim  
499 et al., 2017]. In order to validate whether a single amino acid substitution can change the binding  
500 affinity of a ligand with its target protein or not, molecular docking of ligands(FDA approved



501 drugs) with native and mutant structure was performed. The docking results suggested that  
502 since the mutated residue was away from the binding pocket not much difference in binding  
503 affinity was observed in native and mutant forms except in T857A mutant in which a polar amino  
504 acid has converted to a non-polar amino acid leading to loss of two hydrogen bonds (4H), thereby  
505 decreasing the binding affinity of ligand(Zinc-sulphate) with protein. Binding site similarity  
506 analysis on the basis of PS score and Z score cut-off revealed that many drugs in our dataset  
507 share a similar binding site(Figure 6B). These drugs are more similar based on substructure  
508 features (local similarity) using MACCS fingerprints.(Figure 6). Moreover, the molecular  
509 diversity of 12 drugs binding to 6GQ7 (PIK3GA) suggest the promiscuous nature of the kinase  
510 and enabling insights which are relevant for understanding polypharmacology and negative  
511 side-effects. Further analysis of these and other inhibitors that bind to PIK3GA, clustered by  
512 phenotype information, can give us deeper insights into targeted kinase inhibitor design. The  
513 PPI and Gene Ontology analysis revealed that PIK3CG gene is functionally associated with ten  
514 other genes and most of them are involved in signal transduction, response to stress, anatomical  
515 structure development, immune system process, cellular protein modification process and  
516 biosynthetic process.(Supplemental\_Fig\_S3). PIK3CG gene is altered (Mutation, Amplification,  
517 Loss ) in 2.68% of all cancers. It is found to be associated with lung, colon, and endometrial  
518 adenocarcinoma, cutaneous melanoma, prostate cancer, and breast invasive ductal carcinoma.

519 While in this study, we have explored common variants present in the Indian population,  
520 sampling lower allele frequencies shall be also useful, in the future, to understand the underlying  
521 fundamentals of rare diseases. Additionally, experimental validation of the findings in this study  
522 shall provide further credence to the results.This study on IndiGen variant data may assist in  
523 redesigning the healthcare system from “One Size Fits for All” to “Population or Individual  
524 Specific Drug System” and a big step towards the effective treatment of patients due utilisation  
525 of drugs with less side-effects.

## 526 **Materials and Methods**

### 527 **Variant Data collection**

528 The combined variant data of Indian population was curated from over 1029 whole genome  
529 sequences collected as part of the IndiGen programme to represent diverse Indo-ethnicities. The  
530 variant data comprised of single nucleotide variants and indels which were annotated using  
531 Annovar[Wang et al., 2010]. Only SNVs were considered for our study.

### 532 **Assembling druggable genes**

533 The Drug Gene Interaction Database (DGIdb) version 3 is a database that contains information  
534 on all currently approved drugs as well as other future targets of interest.[Freshour et al.,  
535 2021]. Genes were annotated in this database with respect to known drug-gene interactions and  
536 potential druggability. It normalizes its content from 30 open-source databases like DrugBank  
537 [Wishart et al., 2008], therapeutic target database (TTD)[Chen et al., 2002], PharmGKB  
538 [Boom et al., 2013], The Druggable genome and other web resources like Oncology Knowledge  
539 Base (OncoKB) [With et al., 2017], cancer genome interpreter (CGI) [Tamborero et al., 2018],  
540 etc. A list of 545 druggable kinases and associated FDA approved drugs was retrieved from  
541 the DGIdb using browse category search while limiting the categories to specific resources  
542 i.e 'GuideToPharmacologyGenes'(Supplemental\_Table\_S1). The Guide to Pharmacology is  
543 a curated repository of ligand-activity-target relationships, with the most of its information  
544 derived from high-quality pharmacological and medicinal literature. This druggable kinase gene  
545 list was further enriched by adding features like Ensembl ID, PDB ID, RefSeq Match Transcript,  
546 gene start - gene end, Uniprot ID, sequence length and structure length etc. using BioMart  
547 resource [Smedley et al., 2009] and is automated using python.

### 548 **Data Preparation**

#### 549 **Sequence Data Preparation**

550 Dataset used for sequence analysis contained 545 druggable kinase genes and its associated  
551 variants. Protein sequences for these genes were downloaded from NCBI Genbank and mutant

552 sequences were prepared by adding the variants to the native sequence as per the Annovar data.

### 553 **Structure Data Preparation**

554 Structure Data was prepared by collecting all druggable kinase genes for which a crystallised  
555 protein structure (maximum crystal length) was available in UniProt [Bateman, 2019]. The  
556 variants from IndiGen data with an allele frequency  $\geq 10\%$ , falling within the crystal length  
557 were accounted for in this analysis. After applying these filters, 12 genes and their corresponding  
558 22 variants were left, and were referred to as IndiGen Structure data (Supplemental\_Table\_S4).  
559 In an attempt to conduct a comparative structural analysis, Humsavar (Human polymorphisms  
560 and disease mutations) data was taken. It lists all missense variants annotated in human  
561 UniProtKB/Swiss-Prot entries (Release: 2020\_04 of 12-Aug-2020). In this data the variants  
562 were classified as disease causing (31132- 64.1%), Polymorphisms (39464-23%) and Unclassified  
563 (8381- 12.9%). The variants associated to the genes present in IndiGen Structure data were  
564 extracted from Humsavar complete list of variants. This dataset was referred to as Humsavar  
565 dataset which consisted of total 217 variants, and used for benchmarking structural analysis  
566 (Supplemental\_Table\_S5).

### 567 **Data Processing and Visualization**

#### 568 **Drug, Gene and Variant Tree**

569 The primary goal of this analysis was to have a quantitative and qualitative insight about  
570 frequency of occurrence of variation in family of kinases and availability of drugs against it.  
571 This will aid in gathering information related to the family of kinases with more variations  
572 and drugs reported. An online tool, KinMap [Eid et al., 2017], was used for an interactive  
573 exploration of kinase coding genes present in IndiGen data. The genes associated with 545  
574 druggable kinases, number of variations and drugs reported against each gene in DGIdb was  
575 given as an input to this tool.

## 576 **Amino-acid Conversions and Mutabilities**

577 The tendency of conversion of an amino acid type to another type and identification of any  
578 pattern in this conversion can guide in understanding the change in physicochemical property  
579 of a protein sequence. This analysis was conducted using a python script and the reported  
580 variants for kinases were taken into account. The script generated a 20X20 matrix which gave a  
581 normalized count of each amino acid with respect to other amino acids i.e percent conversion  
582 of each amino acid.  $\text{Normalized count} = (\text{Amino acid count in samples}) / (\text{Amino acid count}$   
583  $\text{from refseq}) * 100$ . This amino-acid exchange matrix was correlated with chemical properties of  
584 mutating amino acids by analysing the chemical shifts associated with variants among different  
585 populations and databases. The overall amino acid count for each class of amino-acids was  
586 summed up for reference and altered residues and the difference in the counts was called as  
587 chemical shift. The mutability of an amino-acid is defined as the ratio of total number of  
588 mutations for a specific amino acid in the data and the frequency of occurrence for that amino  
589 acid in the reference human genome. This mutational frequency was calculated for all the variants  
590 in IndiGen (AF >10%).

## 591 **Multiple Sequence Alignment and Protein Domain Analysis**

592 To understand the effect of SNPs on protein's function it was checked whether the observed  
593 variation (SNPs) is conserved and falls under a protein domain or not. Clustal Omega [Sievers  
594 and Higgins, 2014] was implemented to perform the multi-sequence alignment (MSA). The  
595 protein sequence files in FASTA format were generated using a python script. For protein domain  
596 analysis, Pfam Scan (Embl-ebi n.d.) web server maintained by EMBL-EBI was used. A single  
597 file of all protein sequences in FASTA format was provided to it as input (default parameters).  
598 It gave an output file consisting of domain name, its start and end position corresponding to  
599 every input sequence (hmm\_name, hmm\_start, hmm\_end) and other information. Mutations  
600 which were observed within domain region (hmm\_start - hmm\_end) annotated as 0 for others  
601 the distance of mutation from domain region was also calculated.

## 602 **Variant Protein Structure Generation**

603 Computational protein structure prediction helps in generating a three-dimensional structure  
604 of proteins. The prediction here is based on in-silico techniques and relies on principles from  
605 known protein structures mostly obtained by X-Ray crystallography, NMR Spectroscopy and  
606 physical energy function. Before proceeding to the structure analysis few filters were added to  
607 the base data. These filters were, 1. Availability of protein crystal structure, 2. Availability  
608 of drug molecules against the protein, 3. Crystal structure and sequence coverage  $\geq 70\%$ , 4.  
609 Allele frequency of the nsSNP observed in the IndiGen population  $\geq 10\%$ , 5. SNP coverage  
610 to the crystal structure. In view of the fact that the native crystal structure was already  
611 available in Protein Data Bank, we only require to mutate a single amino acid position by  
612 taking the reference and altered amino acids present in IndiGen structure data for a particular  
613 gene/protein. This single reference amino acid of the protein was mutated using rotkit function  
614 of PyMol that allows access to its mutagenesis feature. The crystal structure of the protein  
615 based on the requirements mentioned above were downloaded from RCSB PDB and mutated  
616 using the rotkit function. This process was automated by python code. It was followed with  
617 energy minimization and refinement of these mutant structures (22 variants) using Chimera  
618 [Pettersen et al., 2004]. The parameters used for minimization of energy include 1000 steepest  
619 descent steps with step size of 0.02 Ang and force-field AMBER ff14SB. For the assessment  
620 of structural stability of the native and mutant protein structures, FoldX [Schymkowitz et al.,  
621 2005] was implemented. FoldX calculates energy differences that come close to experimental  
622 values. The impact of mutations on protein conformation, flexibility and stability was predicted  
623 by Dynamut[Rodrigues et al., 2018]. The structural differences in native and mutant forms  
624 were analyzed using several tools like DSSP (28) for secondary structure annotation of mutated  
625 residue, HBPLUS(29) to study gain or loss of hydrogen bonds after the mutation and Naccess  
626 (27) to compare the solvent accessible surface area of the mutated residue.

## 627 **Molecular Docking**

628 Receptor-ligand docking was performed in order to study the drug-gene interaction and analyze  
629 the effect of SNP in binding affinity of drug with its target protein before and after the occurrence

630 of mutation. A set of kinase genes with FDA approved drugs available in DGIdb were taken into  
631 account. Only 7/12 genes (CHUK, EPHA7, GRK5, MAPK11, MAPK13, PI4K2B, PIK3CG)  
632 from IndiGen structure data were found to exhibit drug-gene interactions given drugs were  
633 FDA approved. The protein structure files (in Protein Data Bank as a PDB format) for these 7  
634 genes and their 7 modelled variants were considered as receptors. Since our dataset comprised  
635 62 ligands that were to be docked with 14 receptors, a virtual screening was performed using  
636 AutoDock vina[Trott and Olson, 2009]. The drugs/ligands were downloaded from DrugBank  
637 and PubChem [Kim et al., 2019] in PDB format. The preparation of receptors (removal of water,  
638 missing hydrogens,etc.) and ligand was followed with their conversion to PDBQT format. In  
639 the absence of any prior information about the target binding site, blind docking was performed  
640 for all the protein-ligand pairs. The docking was performed to the center of the binding cavity  
641 using Cartesian coordinates that differed for every protein calculated using PyRx[Dallakyan,  
642 Sargis; Olson, 2015]. The docking grid with a dimension of 60 Å x 60 Å x 60 Å was used in each  
643 docking calculation with an exhaustiveness option of 100 (average accuracy). The maximum  
644 number of binding modes to generate was kept 500 with an energy range of 20kcal/mol. 50  
645 iterations of these parameters for every target protein was followed.

## 646 **Binding site comparison**

647 Binding site similarity comparison was computed based on the fact that the binding sites on  
648 proteins are more conserved than the rest of the protein structure. Detecting ligand-binding sites  
649 similarities in globally unrelated proteins can help in the repurposing of new drugs, predicting  
650 side-effects, severe toxicity, and drug-target interactions. There exists a basic principle that  
651 similar pockets or cavities in a protein structure recognize similar type of ligands, so as to  
652 validate this principle, several protein-ligand binding site comparison methods are available  
653 which are utilized in many drug discovery scenarios, one such tool is DeeplyTough [Simonovsky  
654 and Meyers, 2020]. Since the proteins used in this work belong to the kinase family, it is highly  
655 likely that they share similar binding pockets. Fpocket [Le Guilloux et al., 2009] was used to  
656 locate all the binding pockets present in the protein. For every target protein, only those pockets  
657 which aligned to the best binding pose of docked ligand were given as input to DeeplyTough

658 for assessment of similar binding sites. This tool gave Pocket similarity score as an output for  
659 each input protein-pocket pair. Since the difference in PS score among the input pairs was  
660 very small, Z-score (orange line) was calculated for every PS-score in order to claim similar  
661 pocket pairs with some statistical significance. In order to classify the pockets pairs as similar,  
662 dissimilar or intermediate, a Z-score cut-off was considered (-/+0.70).

### 663 **Ligand similarity/diversity analysis**

664 Molecular similarity of the ligands (drugs) can be assessed using their structural features (e.g.,  
665 shared substructures, ring systems, functional groups, topologies, etc.) of the compounds  
666 and their representations in the N-dimensional chemical space. These descriptors are often  
667 defined by mathematical functions of molecular structures. In this analysis, MACCS (Molecular  
668 ACCess System) keys with 166 keys and circular -Morgan fingerprints with radius 2 were  
669 used[Fernández-De Gortari et al., 2017]. These fingerprint-based similarity computations were  
670 implemented using the popular chemoinformatics package RDkit [Bento et al., 2020] in python.  
671 Tanimoto similarity coefficient was used to compute a quantitative score in order to measure the  
672 degree of ligand similarity and dissimilarity (1-similarity)- using weighted values of molecular  
673 descriptors.

### 674 **Phenotypic drug-drug similarity**

675 The tendency of a drug to bind to multiple targets is called drug polypharmacology, it is well  
676 known property of drugs. Reports have suggested about the association of drug polypharmacology  
677 with the target protein family and binding site similarity of their primary targets [Jalencas and  
678 Mestres, 2013]. If two drug molecules target same gene product then they are expected to have  
679 similar activities and mechanism of action[Prinz et al., 2016]. Thus, repurposed form of similar  
680 drugs can act as alternative to the ones with adverse drug reactions. On the basis of drug-gene  
681 interaction data obtained from DGIdb several drugs were observed to have same target protein.

## 682 Author contribution

683 G.P., N.M., A.R. conceptualized the study, performed analysis and wrote the manuscript. D.S.,  
684 R.C.B., A.J., M.I., V.S., M.K.D., A.M., S.S., and V.S. generated the IndiGen data and assisted  
685 in the inputs in the manuscripts. P.G. performed the domain analysis. G.P., N.M., and P.B.  
686 performed the pharmacogenomic analysis and P.B., S.S. and V.S. gave critical insights during  
687 the manuscript writing.

## 688 References

- 689 G. Abrusán and J. A. Marsh. Alpha Helices Are More Robust to Mutations than Beta Strands.  
690 *PLoS Computational Biology*, 12(12):1–16, 2016. ISSN 15537358. doi: 10.1371/journal.pcbi.  
691 1005242.
- 692 M. A.J. Marian. Nihms346353.Pdf. 159(2):64–79, 2013. doi: 10.1016/j.trsl.2011.08.001.  
693 Molecular.
- 694 Z. B. Alwi. The Use of SNPs in Pharmacogenomics Studies. *The Malaysian jour-*  
695 *nal of medical sciences : MJMS*, 12(2):4–12, 2005. ISSN 1394-195X. URL  
696 <http://www.ncbi.nlm.nih.gov/pubmed/22605952>{%}0A[http://www.pubmedcentral.](http://www.pubmedcentral.nih.gov/articlerender.fcgi?artid=PMC3349395)  
697 [nih.gov/articlerender.fcgi?artid=PMC3349395](http://www.pubmedcentral.nih.gov/articlerender.fcgi?artid=PMC3349395).
- 698 H. Ashkenazy, S. Abadi, E. Martz, O. Chay, I. Mayrose, T. Pupko, and N. Ben-Tal. ConSurf  
699 2016: an improved methodology to estimate and visualize evolutionary conservation in  
700 macromolecules. *Nucleic acids research*, 44(W1):W344–W350, 2016. ISSN 13624962. doi:  
701 10.1093/nar/gkw408.
- 702 M. Bamshad, T. Kivisild, W. S. Watkins, M. E. Dixon, C. E. Ricker, B. B. Rao, J. M. Naidu,  
703 B. V. Prasad, P. G. Reddy, A. Rasanayagam, S. S. Papiha, R. Villems, A. J. Redd, M. F.  
704 Hammer, S. V. Nguyen, M. L. Carroll, M. A. Batzer, and L. B. Jorde. Genetic evidence  
705 on the origins of Indian caste populations. *Genome Research*, 11(6):994–1004, 2001. ISSN  
706 10889051. doi: 10.1101/gr.GR-1733RR.



- 707 P. Banerjee, A. O. Eckert, A. K. Schrey, and R. Preissner. ProTox-II: A webserver for the  
708 prediction of toxicity of chemicals. *Nucleic Acids Research*, 46(W1):W257–W263, 2018. ISSN  
709 13624962. doi: 10.1093/nar/gky318.
- 710 A. Bateman. UniProt: A worldwide hub of protein knowledge. *Nucleic Acids Research*, 47(D1):  
711 D506–D515, 2019. ISSN 13624962. doi: 10.1093/nar/gky1049.
- 712 A. Bennisroune, A. Gardin, D. Aunis, G. Crémel, and P. Hubert. Tyrosine kinase receptors as  
713 attractive targets of cancer therapy. *Critical Reviews in Oncology/Hematology*, 50(1):23–38,  
714 2004. ISSN 10408428. doi: 10.1016/j.critrevonc.2003.08.004.
- 715 A. P. Bento, A. Hersey, E. Félix, G. Landrum, A. Gaulton, F. Atkinson, L. J. Bellis, M. De Veij,  
716 and A. R. Leach. An open source chemical structure curation pipeline using RDKit. *Journal*  
717 *of Cheminformatics*, 12(1):1–16, 2020. ISSN 17582946. doi: 10.1186/s13321-020-00456-1.  
718 URL <https://doi.org/10.1186/s13321-020-00456-1>.
- 719 N. Berndt, R. M. Karim, and E. Schönbrunn. Advances of small molecule targeting of kinases.  
720 *Current Opinion in Chemical Biology*, 39:126–132, 2017. ISSN 18790402. doi: 10.1016/j.cbpa.  
721 2017.06.015.
- 722 D. Bhosle, A. Sayyed, A. Bhagat, H. Shaikh, A. Sheikh, V. Bhopale, and Z. Quazi. Comparison  
723 of Generic and Branded Drugs on Cost Effective and Cost Benefit Analysis. *Annals of*  
724 *International medical and Dental Research*, 3(1):1–6, 2016. ISSN 23952814. doi: 10.21276/  
725 aimdr.2017.3.1.pc1.
- 726 K. S. Bhullar, N. O. Lagarón, E. M. McGowan, I. Parmar, A. Jha, B. P. Hubbard, and H. P.  
727 Rupasinghe. Kinase-targeted cancer therapies: Progress, challenges and future directions.  
728 *Molecular Cancer*, 17(1):1–20, 2018. ISSN 14764598. doi: 10.1186/s12943-018-0804-2.
- 729 D. V. D. Boom, M. Wjst, and R. E. Everts. PharmGKB: The Pharmacogenomics Knowledge Base  
730 Caroline. *Methods in Molecular Biology*, 1015:71–85, 2013. doi: 10.1007/978-1-62703-435-7.  
731 URL <http://link.springer.com/10.1007/978-1-62703-435-7>.
- 732 S. L. Chan, S. Jin, M. Loh, and L. R. Brunham. Progress in understanding the genomic

- 733 basis for adverse drug reactions: A comprehensive review and focus on the role of ethnicity.  
734 *Pharmacogenomics*, 16(10):1161–1178, 2015. ISSN 17448042. doi: 10.2217/PGS.15.54.
- 735 X. Chen, Z. L. Ji, and Y. Z. Chen. TTD: Therapeutic Target Database. *Nucleic Acids Research*,  
736 30(1):412–415, 2002. ISSN 03051048. doi: 10.1093/nar/30.1.412.
- 737 T. M. Christensen, Z. Vejlupkova, Y. K. Sharma, K. M. Arthur, J. W. Spatafora, C. A. Albright,  
738 R. B. Meeley, J. P. Duvick, R. S. Quatrano, and J. E. Fowler. Conserved subgroups and  
739 developmental regulation in the monocot rop gene family. *Plant Physiology*, 133(4):1791–1808,  
740 2003. ISSN 0032-0889. doi: 10.1104/pp.103.029900. URL [http://www.plantphysiol.org/  
741 content/133/4/1791](http://www.plantphysiol.org/content/133/4/1791).
- 742 G. Clinical and P. Guidelines. Drug development research in resource-limited countries. *Group*,  
743 (December 2005):1–101, 2006.
- 744 A. Dallakyan, Sargis; Olson. Participation in global governance: Coordinating ”the voices of  
745 those most affected by food insecurity”. *Global Food Security Governance*, 1263:1–11, 2015.  
746 ISSN 0717-6163. doi: 10.1007/978-1-4939-2269-7.
- 747 M. De Wit, C. B. Boers-Doets, A. Saettini, K. Vermeersch, C. R. De Juan, J. Ouwerkerk,  
748 S. S. Raynard, A. Bazin, and C. Cremolini. Prevention and management of adverse events  
749 related to regorafenib. *Supportive Care in Cancer*, 22(3):837–846, 2014. ISSN 14337339. doi:  
750 10.1007/s00520-013-2085-z.
- 751 S. Eid, S. Turk, A. Volkamer, F. Rippmann, and S. Fulle. Kinmap: A web-based tool  
752 for interactive navigation through human kinome data. *BMC Bioinformatics*, 18(1):1–6,  
753 2017. ISSN 14712105. doi: 10.1186/s12859-016-1433-7. URL [http://dx.doi.org/10.1186/  
754 s12859-016-1433-7](http://dx.doi.org/10.1186/s12859-016-1433-7).
- 755 J.-L. FAUCHÈRE, M. Charton, L. B. Kier, A. Verloop, and V. Pliska. Amino acid side chain  
756 parameters for correlation studies in biology and pharmacology. *International Journal of*  
757 *Peptide and Protein Research*, 32(4):269–278, 1988. ISSN 13993011. doi: 10.1111/j.1399-3011.  
758 1988.tb01261.x.

- 759 E. Fernández-De Gortari, C. R. García-Jacas, K. Martínez-Mayorga, and J. L. Medina-Franco.  
760 Database fingerprint (DFP): an approach to represent molecular databases. *Journal of*  
761 *Cheminformatics*, 9(1):1–9, 2017. ISSN 17582946. doi: 10.1186/s13321-017-0195-1.
- 762 S. French and B. Robson. What is a conservative substitution? *Journal of Molecular Evolution*,  
763 19(2):171–175, 1983. ISSN 00222844. doi: 10.1007/BF02300754.
- 764 S. L. Freshour, S. Kiwala, K. C. Cotto, A. C. Coffman, J. F. McMichael, J. J. Song, M. Griffith,  
765 O. Griffith, and A. H. Wagner. Integration of the Drug–Gene Interaction Database (DGIdb  
766 4.0) with open crowdsourcing efforts. *Nucleic Acids Research*, 49(D1):D1144–D1151, 2021.  
767 ISSN 0305-1048. doi: 10.1093/nar/gkaa1084.
- 768 L. Gerasimavicius, X. Liu, and J. A. Marsh. Identification of pathogenic missense mutations  
769 using protein stability predictors. *Scientific Reports*, 10(1):1–10, 2020. ISSN 20452322. doi:  
770 10.1038/s41598-020-72404-w. URL <https://doi.org/10.1038/s41598-020-72404-w>.
- 771 S. Gong and T. L. Blundell. Structural and functional restraints on the occurrence of single  
772 amino acid variations in human proteins. *PLoS ONE*, 5(2), 2010. ISSN 19326203. doi:  
773 10.1371/journal.pone.0009186.
- 774 P. Impicciatore, I. Choonara, A. Clarkson, D. Provasi, C. Pandolfini, and M. Bonati. Incidence  
775 of adverse drug reactions in paediatric in/out-patients: A systematic review and meta-analysis  
776 of prospective studies. *British Journal of Clinical Pharmacology*, 52(1):77–83, 2001. ISSN  
777 03065251. doi: 10.1046/j.0306-5251.2001.01407.x.
- 778 A. Jain, R. C. Bhojar, K. Pandhare, A. Mishra, D. Sharma, M. Imran, V. Senthivel, M. K.  
779 Divakar, M. Rophina, B. Jolly, A. Batra, S. Sharma, S. Siwach, A. G. Jadhao, N. V.  
780 Palande, G. N. Jha, N. Ashrafi, P. K. Mishra, A. K. Vidhya, S. Jain, D. Dash, N. S.  
781 Kumar, A. Vanlallawma, R. J. Sarma, L. Chhakchhuak, S. Kalyanaraman, R. Mahadevan,  
782 S. Kandasamy, B. M. Pabitha, R. E. Rajagopal, R. J. Ezhil, D. P. P. Nirmala, A. Bajaj,  
783 V. Gupta, S. Mathew, S. Goswami, M. Mangla, S. Prakash, K. Joshi, Meyakumla, S. Sreedevi,  
784 D. Gajjar, R. Soraisham, R. Yadav, Y. S. Devi, A. Gupta, M. Mukerji, S. Ramalingam, B. K.  
785 Binukumar, V. Scaria, and S. Sivasubbu. IndiGenomes: A comprehensive resource of genetic

- 786 variants from over 1000 Indian genomes. *Nucleic Acids Research*, 49(D1):D1225–D1232, 2021.  
787 ISSN 13624962. doi: 10.1093/nar/gkaa923.
- 788 X. Jalencas and J. Mestres. On the origins of drug polypharmacology. *MedChemComm*, 4(1):  
789 80–87, 2013. ISSN 20402511. doi: 10.1039/c2md20242e.
- 790 P. Kim, J. Zhao, P. Lu, and Z. Zhao. MutLBSgeneDB: Mutated ligand binding site gene  
791 DataBase. *Nucleic Acids Research*, 45(D1):D256–D263, 2017. ISSN 13624962. doi: 10.1093/  
792 nar/gkw905.
- 793 S. Kim, J. Chen, T. Cheng, A. Gindulyte, J. He, S. He, Q. Li, B. A. Shoemaker, P. A. Thiessen,  
794 B. Yu, L. Zaslavsky, J. Zhang, and E. E. Bolton. PubChem 2019 update: Improved access  
795 to chemical data. *Nucleic Acids Research*, 47(D1):D1102–D1109, 2019. ISSN 13624962. doi:  
796 10.1093/nar/gky1033.
- 797 S. K. Krishnamoorthy, V. Relias, S. Sebastian, V. Jayaraman, and M. W. Saif. Management  
798 of regorafenib-related toxicities: A review. *Therapeutic Advances in Gastroenterology*, 8(5):  
799 285–297, 2015. ISSN 17562848. doi: 10.1177/1756283X15580743.
- 800 A. Kumar and P. Biswas. Effect of site-directed point mutations on protein misfolding: A  
801 simulation study. *Proteins: Structure, Function and Bioinformatics*, 87(9):760–773, 2019.  
802 ISSN 10970134. doi: 10.1002/prot.25702.
- 803 V. Le Guilloux, P. Schmidtke, and P. Tuffery. Fpocket: An open source platform for ligand  
804 pocket detection. *BMC Bioinformatics*, 10:1–11, 2009. ISSN 14712105. doi: 10.1186/  
805 1471-2105-10-168.
- 806 N. H. Lee. Pharmacogenetics of drug metabolizing enzymes and transporters: effects on phar-  
807 macokinetics and pharmacodynamics of anticancer agents. *Anti-cancer agents in medicinal*  
808 *chemistry*, 10(8):583–92, 2010. ISSN 1875-5992. URL [http://www.pubmedcentral.nih.gov/  
809 articlerender.fcgi?artid=3770187&tool=pmcentrez&rendertype=abstract](http://www.pubmedcentral.nih.gov/articlerender.fcgi?artid=3770187&tool=pmcentrez&rendertype=abstract).
- 810 A. M. L. S. M. Christopher. Genetic and epigenetic heterogeneity in acute myeloid leukemias.  
811 *Physiology & behavior*, 176(1):100–106, 2016a. doi: 10.1016/j.str.2015.03.028.Insights.

- 812 A. M. L. S. M. Christopher. HHS Public Access. *Physiology & behavior*, 176(1):100–106, 2016b.  
813 doi: 10.1159/000373949.Phosphatidylinositol-3.
- 814 J. Mattei, L. D. Parnell, C. Q. Lai, B. Garcia-Bailo, X. Adiconis, J. Shen, D. Arnett, S. Demissie,  
815 K. L. Tucker, and J. M. Ordovas. Disparities in allele frequencies and population differentiation  
816 for 101 disease-associated single nucleotide polymorphisms between Puerto Ricans and non-  
817 Hispanic whites. *BMC Genetics*, 10:1–12, 2009. ISSN 14712156. doi: 10.1186/1471-2156-10-45.
- 818 M. Mori, R. Yamada, K. Kobayashi, R. Kawaida, and K. Yamamoto. Ethnic differences in  
819 allele frequency of autoimmune-disease-associated SNPs. *Journal of Human Genetics*, 50(5):  
820 264–266, 2005. ISSN 14345161. doi: 10.1007/s10038-005-0246-8.
- 821 N. Nakatsuka, P. Moorjani, N. Rai, B. Sarkar, A. Tandon, N. Patterson, G. S. Bhavani,  
822 K. M. Girisha, M. S. Mustak, S. Srinivasan, A. Kaushik, S. A. Vahab, S. M. Jagadeesh,  
823 K. Satyamoorthy, L. Singh, D. Reich, and K. Thangaraj. The promise of discovering  
824 population-specific disease-associated genes in south asia. *Nature Genetics*, 49(9):1403–1407,  
825 sep 2017. ISSN 1061-4036. doi: 10.1038/ng.3917. URL [http://www.nature.com/doifinder/](http://www.nature.com/doifinder/10.1038/ng.3917)  
826 [10.1038/ng.3917](http://www.nature.com/doifinder/10.1038/ng.3917).
- 827 M. K. Paul and A. K. Mukhopadhyay. Tyrosine kinase – Role and significance in Cancer.  
828 *International Journal of Medical Sciences*, 1(283):101–115, 2012. ISSN 1449-1907. doi:  
829 [10.7150/ijms.1.101](https://doi.org/10.7150/ijms.1.101).
- 830 E. F. Pettersen, T. D. Goddard, C. C. Huang, G. S. Couch, D. M. Greenblatt, E. C. Meng,  
831 and T. E. Ferrin. UCSF Chimera - A visualization system for exploratory research and  
832 analysis. *Journal of Computational Chemistry*, 25(13):1605–1612, 2004. ISSN 01928651. doi:  
833 [10.1002/jcc.20084](https://doi.org/10.1002/jcc.20084).
- 834 C. Pivonello, G. Muscogiuri, A. Nardone, F. Garifalos, D. P. Provisiero, N. Verde, C. De  
835 Angelis, A. Conforti, M. Piscopo, R. S. Auriemma, A. Colao, and R. Pivonello. Bisphenol A:  
836 An emerging threat to female fertility. *Reproductive Biology and Endocrinology*, 18(1), 2020.  
837 ISSN 14777827. doi: 10.1186/s12958-019-0558-8.

- 838 M. Pomaznoy, B. Ha, and B. Peters. GOnet: A tool for interactive Gene Ontology analysis.  
839 *BMC Bioinformatics*, 19(1):1–8, 2018. ISSN 14712105. doi: 10.1186/s12859-018-2533-3.
- 840 J. Prinz, I. Vogt, G. Adornetto, and M. Campillos. A Novel Drug-Mouse Phenotypic Similarity  
841 Method Detects Molecular Determinants of Drug Effects. *PLoS Computational Biology*, 12  
842 (9):1–29, 2016. ISSN 15537358. doi: 10.1371/journal.pcbi.1005111.
- 843 L. RA and S. MB. LigPlot+: multiple ligand-protein interaction diagrams for drug discovery.  
844 *Journal of Chemical Information and Modeling*, 51:2778–2786, 2011.
- 845 C. H. Rodrigues, D. E. Pires, and D. B. Ascher. DynaMut: Predicting the impact of mutations on  
846 protein conformation, flexibility and stability. *Nucleic Acids Research*, 46(W1):W350–W355,  
847 2018. ISSN 13624962. doi: 10.1093/nar/gky300.
- 848 D. Rodriguez-Larrea, R. Perez-Jimenez, I. Sanchez-Romero, A. Delgado-Delgado, J. M. Fernan-  
849 dez, and J. M. Sanchez-Ruiz. Role of conservative mutations in protein multi-property adapta-  
850 tion. *Biochemical Journal*, 429(2):243–249, 2010. ISSN 02646021. doi: 10.1042/BJ20100386.
- 851 D. K. Sanghera, L. Ortega, S. Han, J. Singh, S. K. Ralhan, G. S. Wander, N. K. Mehra, J. J.  
852 Mulvihill, R. E. Ferrell, S. K. Nath, and M. I. Kamboh. Impact of nine common type 2  
853 diabetes risk polymorphisms in Asian Indian Sikhs: PPAR $\gamma$ 2 (Pro12Ala), IGF2BP2, TCF7L2  
854 and FTO variants confer a significant risk. *BMC Medical Genetics*, 9(Ci):1–9, 2008. ISSN  
855 14712350. doi: 10.1186/1471-2350-9-59.
- 856 L. Schrödinger and W. DeLano. Pymol. URL <http://www.pymol.org/pymol>.
- 857 J. Schymkowitz, J. Borg, F. Stricher, R. Nys, F. Rousseau, and L. Serrano. The FoldX web  
858 server: An online force field. *Nucleic Acids Research*, 33(SUPPL. 2):382–388, 2005. ISSN  
859 03051048. doi: 10.1093/nar/gki387.
- 860 D. Sengupta, A. Choudhury, A. Basu, and M. Ramsay. Population stratification and underrepre-  
861 sentation of Indian subcontinent genetic diversity in the 1000 genomes project dataset. *Genome  
862 Biology and Evolution*, 8(11):3460–3470, 2016. ISSN 17596653. doi: 10.1093/gbe/evw244.

- 863 S. T. Sherry, M. H. Ward, M. Kholodov, J. Baker, L. Phan, E. M. Smigielski, and K. Sirotkin.  
864 DbSNP: The NCBI database of genetic variation. *Nucleic Acids Research*, 29(1):308–311,  
865 2001. ISSN 03051048. doi: 10.1093/nar/29.1.308.
- 866 F. Sievers and D. G. Higgins. Clustal omega, accurate alignment of very large numbers  
867 of sequences. *Methods in Molecular Biology*, 1079:105–116, 2014. ISSN 10643745. doi:  
868 10.1007/978-1-62703-646-7\_6.
- 869 M. Simonovsky and J. Meyers. DeeplyTough: Learning Structural Comparison of Protein  
870 Binding Sites. *Journal of chemical information and modeling*, 60(4):2356–2366, 2020. ISSN  
871 1549960X. doi: 10.1021/acs.jcim.9b00554.
- 872 G. Sirugo, S. M. Williams, and S. A. Tishkoff. The missing diversity in human genetic  
873 studies. *Cell*, 177(1):26–31, mar 2019. ISSN 00928674. doi: 10.1016/j.cell.2019.02.048. URL  
874 <https://linkinghub.elsevier.com/retrieve/pii/S0092867419302314>.
- 875 D. Smedley, S. Haider, B. Ballester, R. Holland, D. London, G. Thorisson, and A. Kasprzyk.  
876 BioMart - Biological queries made easy. *BMC Genomics*, 10:1–12, 2009. ISSN 14712164. doi:  
877 10.1186/1471-2164-10-22.
- 878 D. Szklarczyk, A. L. Gable, D. Lyon, A. Junge, S. Wyder, J. Huerta-Cepas, M. Simonovic,  
879 N. T. Doncheva, J. H. Morris, P. Bork, L. J. Jensen, and C. Von Mering. STRING v11:  
880 Protein-protein association networks with increased coverage, supporting functional discovery  
881 in genome-wide experimental datasets. *Nucleic Acids Research*, 47(D1):D607–D613, 2019.  
882 ISSN 13624962. doi: 10.1093/nar/gky1131.
- 883 D. Tamborero, C. Rubio-Perez, J. Deu-Pons, M. P. Schroeder, A. Vivancos, A. Rovira, I. Tus-  
884 quets, J. Albanell, J. Rodon, J. Tabernero, C. de Torres, R. Dienstmann, A. Gonzalez-Perez,  
885 and N. Lopez-Bigas. Cancer genome interpreter annotates the biological and clinical relevance  
886 of tumor alterations. *Genome Medicine*, 10(1):25, mar 2018. doi: 10.1186/s13073-018-0531-8.  
887 URL <http://dx.doi.org/10.1186/s13073-018-0531-8>.
- 888 O. Trott and A. J. Olson. AutoDock Vina: Improving the speed and accuracy of docking with

889 a new scoring function, efficient optimization, and multithreading. *Journal of Computational*  
890 *Chemistry*, 31(2):NA–NA, 2009. ISSN 01928651. doi: 10.1002/jcc.21334.

891 K. Wang, M. Li, and H. Hakonarson. ANNOVAR: functional annotation of genetic variants  
892 from high-throughput sequencing data. *Nucleic Acids Research*, 38(16):e164, sep 2010. doi:  
893 10.1093/nar/gkq603. URL <http://dx.doi.org/10.1093/nar/gkq603>.

894 X. Wang, J. Ding, and L. H. Meng. PI3K isoform-selective inhibitors: Next-generation targeted  
895 cancer therapies. *Acta Pharmacologica Sinica*, 36(10):1170–1176, 2015. ISSN 17457254. doi:  
896 10.1038/aps.2015.71.

897 C. Y. Wei, M. T. Michael lee, and Y. T. Chen. Pharmacogenomics of adverse drug reactions:  
898 Implementing personalized medicine. *Human Molecular Genetics*, 21(R1):58–65, 2012. ISSN  
899 09646906. doi: 10.1093/hmg/dds341.

900 D. S. Wishart, C. Knox, A. C. Guo, D. Cheng, S. Shrivastava, D. Tzur, B. Gautam, and  
901 M. Hassanali. DrugBank: A knowledgebase for drugs, drug actions and drug targets. *Nucleic*  
902 *Acids Research*, 36(SUPPL. 1):901–906, 2008. ISSN 03051048. doi: 10.1093/nar/gkm958.

903 P. With, M. Oncokb, U. S. Food, N. Comprehensive, C. Network, R. To, C. Genomics, C. Oncokb,  
904 I. The, U. S. Food, and N. Com. OncoKB : A Precision Oncology Knowledge Base. *JCO*  
905 *Precision Oncology*, (1):1–16, 2017.
